# Supplementary material
Source: PubMed Central journal article supplement (PMC4246268)
Supplement: pnas.201409064SI.pdf [file pnas.201409064SI.pdf]

# Supporting Information

Ren et al. 10.1073/pnas.1409064111

## SI Materials and Methods

**Lineage Tracing.** *Lgr6-EGFP-ires-CreERT2* mice were crossed with *Rosa26-tdTomato* mice to generate *Lgr6<sup>+/-</sup>; Rosa-tdTomato<sup>+/-</sup>* progeny, which were confirmed by genotyping using primer sets recommended by Jackson Lab. Mice 8–16 wk old received a single i.p. injection of tamoxifen (0.22 mg/g) dissolved in sunflower seed oil (Sigma, S5007). Mice were killed 1 d, 2 wk, and 1 mo after induction with tamoxifen. Taste buds with tdTomato<sup>+</sup> cells in fungiform papillae from 10- $\mu$ m sections were identified, and then the number of tdTomato<sup>+</sup> cells in each taste bud was counted (a single taste bud spans two to four consecutive sections, and we chose the section with the most labeled cells for a single taste bud for statistical analysis. The boundary of taste buds was determined by differential interference contrast microscopy). Data represent mean  $\pm$  SE and total number of taste buds examined. tdTomato<sup>+</sup> cells in taste buds in circumvallate papilla were counted the same way. Statistical analyses were performed with unpaired two-tailed Student *t* test.

**Cell Sorting.** To obtain taste *Lgr5<sup>+</sup>* or *Lgr6<sup>+</sup>* cells, tongues from *Lgr5-EGFP-ires-CreERT2* or *Lgr6-EGFP-ires-CreERT2* mice were injected with  $\sim$ 0.5 mL of an enzyme mixture containing elastase (0.1 U/mL, Sigma), protease (2 mg/mL, Sigma), and DNase I (10 mg/mL, Invitrogen) or dispase (2 mg/mL, Roche) and collagenase (1 mg/mL, Roche) in Tyrode's solution (145 mM NaCl, 5 mM KCl, 10 mM Hepes, 5 mM NaHCO<sub>3</sub>, 10 mM pyruvate, 10 mM glucose) for 15 min at 37 °C. Tongue epithelium was peeled gently from the connective tissue underneath, and the regions surrounding the circumvallate and foliate papillae were dissected out and collected. Tissues were minced using scissors, further treated with trypsin (0.25%) for 15–30 min, and mechanically dissociated into single cells using a fire-polished glass pipette. Single-cell suspensions were filtered using 70- $\mu$ m nylon mesh (BD Falcon #352350) to remove large aggregates, followed by further filtering with 35- $\mu$ m nylon mesh (BD Falcon #352235). Cells were sorted using a FACS machine (Flow Cytometry and Cell Sorting Resource Laboratory, University of Pennsylvania), according to the green fluorescent EGFP signal (excitation, 488 nm; emission, 530 nm). For clonal analysis, we sorted *Lgr5-EGFP<sup>+</sup>* cells from six *Lgr5-EGFP-ires-CreERT2<sup>+/-</sup>; Rosa-tdTomato<sup>+/-</sup>* mice; three of them received a single tamoxifen injection 1 d before sorting. Cells were sorted into individual wells in 200  $\mu$ L taste culture medium.

**3D Organoid Cultures.** Sorted *Lgr5<sup>+</sup>* or *Lgr6<sup>+</sup>* cells from taste tissue were cultured with minor modifications according to Clevers' protocol (1) for culturing intestinal stem cells. Taste culture medium is based on DMEM/F12 medium (Life Technologies) supplemented with R-spondin-1 (200 ng/mL, R&D), Noggin (100 ng/mL, PeproTech), Jagged-1 (1  $\mu$ M, Anaspec), Y27632 (10  $\mu$ M), *N*-acetylcysteine (1 mM, Sigma), epidermal growth factor (50 ng/mL, Life Technologies), N2 (1%, Life Technologies), and B27 [2% (vol/vol), Life Technologies]. Sorted cells in taste culture medium were mixed with chilled Matrigel (BD Biosciences) at a volume ratio of 1:1 and then seeded on prewarmed 24-well plates at a density of 100–200 cells per well or 96-well plates at a density of 1–10 cells per well. In some cases, sonic hedgehog (shh) was added into the medium; however, we did not observe any significant effect of shh on our organoid cultures. Medium was changed every 2–3 d. For passage studies, organoids were digested into smaller pieces using trypsin (0.25%) for 10 min after 10 d in culture and reseeded into fresh Matrigel. To de-

termine the area of an organoid, we used SPOT 5.1 Advanced software. Organoids with a typical round shape were counted for the experiments performed in Fig. S1. Plating efficiency was estimated by the number of round organoids (typically around day 7) over the number of sorted cells plated ( $\sim$ 300 organoids grown out from  $\sim$ 3,000 sorted cells from two to three mice for a typical experiment). Organoids with intrinsic GFP were visualized under an inverted microscope. About 100 organoids from *Lgr5<sup>+</sup>* cells were found to have strong intrinsic GFP fluorescence from more than  $\sim$ 1,500 organoids (day 7) counted from two independent preparations (from two preparations we found 43 and 61 organoids with GFP fluorescence, out of 374 and 1201 organoids, respectively; and only two of 12 preparations of *Lgr5<sup>+</sup>* cells had organoids with intrinsic GFP fluorescence);  $\sim$ 130 organoids from *Lgr6<sup>+</sup>* cells were found to have strong intrinsic GFP fluorescence from more than  $\sim$ 1,500 organoids (day 7) counted from two independent preparations (from two preparations we found three and 129 organoids with GFP fluorescence out of 106 and 1447 organoids, respectively; and only two of eight preparations of *Lgr6<sup>+</sup>* cells had organoids with intrinsic GFP fluorescence).

**Immunostaining.** For coimaging taste cell markers and intrinsic tdTomato fluorescence, we used mice that were killed 1 mo after induction with tamoxifen. Tissues were fixed in 4% (wt/vol) paraformaldehyde for 2 h, cryoprotected with 30% sucrose overnight, and sectioned at 10  $\mu$ m. To distinguish distinct types of taste cells, we used specific primary antibodies against taste cell markers and species-specific secondary antibodies: type 2 taste cells, guinea pig anti-Trpm5 (transient receptor potential cation channel subfamily M member 5; gift from Emily Liman; 1:500) and rabbit anti-gustducin (Santa Cruz; 1:500, Research Resource Identifier [RRID] #AB\_673678); type 3 taste cells, goat anti-5-HT (serotonin; Immunostar; 1:100, RRID #AB\_572262). For serotonin detection, mice were injected with 5-hydroxytryptophan (Sigma) 1 h before being killed to allow detection of 5-HT in type 3 cells. Species-specific Alexa-Fluo 647-conjugated secondary antibodies were used to visualize specific taste cell markers.

For cultured organoids, individual colonies were picked from culture plates using a 1-mL pipette and reseeded briefly in a slide chamber to allow attachment to the glass slide coated with polylysine for immunostaining. Organoids were then fixed for 15 min with 4% paraformaldehyde in 1 $\times$  PBS supplemented with MgCl<sub>2</sub> (5 mM), EGTA (10 mM), and sucrose [4% (wt/vol)] (2). Organoids were examined for the intrinsic EGFP fluorescence before immunostaining to determine whether the secondary antibodies with 488 fluorophore can be used for triple-color staining. Organoids were washed 3 $\times$  with PBS, followed by incubation with a blocking buffer [SuperBlock (Thermo Scientific PI-37525) + 2% (vol/vol) donkey serum + 0.3% Triton X-100] for 1 h. Primary antibody incubation was performed overnight at 4 °C. After washing three times with PBS, appropriate secondary antibodies were used to visualize staining as a whole-mount preparation. The primary antibodies were used as follows: rabbit anti-K14 (Covance; 1:500, RRID #AB\_10063486), rabbit anti-K5 (Abcam; 1:500, RRID #AB\_24647), rat anti-K8 (Developmental Studies Hybridoma Bank; 1:10, RRID #AB\_531826), rabbit anti-gustducin (Santa Cruz; 1:500, RRID #AB\_673678), goat anti-CA4 (Abcam; 1:20, RRID #AF2414), rabbit anti-Plc $\beta$ 2 (Santa Cruz; 1:100, RRID #AB\_632197), rabbit anti-NTPDase2 (Centre de Recherche du CHUL, Quebec, Canada; 1:500, RRID #AB\_2314986), and goat anti-T1R3 (Santa Cruz; 1:200,

RRID #AB\_2200953). As negative controls, secondary antibodies showed no staining. All images were acquired by either a Nikon Eclipse E800 microscope or a Leica Sp2 confocal microscope. Confocal images were compressed z-stacks (~3  $\mu\text{m}$ ); single optical sections gave rise to the same results as the z-stacks.

**BrdU Labeling.** BrdU (Invitrogen, 00–0103) tracing was performed by following the manufacturer's protocol. Briefly, BrdU was added into medium in which organoids were cultured at 1:100 dilution (3  $\mu\text{g}/\text{mL}$ ) overnight. Organoids were then fixed as described earlier. BrdU immunostaining was performed according to a standard acid treatment protocol, using a mouse anti-BrdU antibody (R&D, 1:200, RRID #AB\_10972641).

**Calcium Imaging.** Cultured organoids (days 15–32) were reseeded onto coverslips coated with polylysine and laminin (Sigma, L2020) and allowed to attach and grow into 2D culture for up to 2 wk in the same taste culture medium as described for 3D cultures. Before calcium imaging, cells were loaded with calcium indicator dye fura-2 in a modified Tyrode's buffer (30 mM NaCl, 110 mM *N*-methyl-D-glucamine, 5 mM KCl, 4 mM  $\text{CaCl}_2$ , 1 mM  $\text{MgCl}_2$ , 10 mM glucose, 10 mM Hepes, 1 mM Na-pyruvate at pH 7.4) for 30 min and mounted onto a perfusion chamber with continuous perfusion of the modified Tyrode's buffer. Cells were imaged under an Olympus fluorescence microscopy. Fluorescence images were obtained at excitation wavelengths of 340 and 380 nm with an emission wavelength of 460–600 nm using MetaFluro 7.5 imaging software (Olympus). Cells were then assayed for their responses to tastants: denatonium (5 mM, 10 mM, and 20 mM), acesulfame-K (5 mM, 20 mM), sucralose (15 mM, 30 mM), NaCl (200 mM, 250 mM), KCl (50 mM), citric

acid (50 mM at pH 4), and monosodium glutamate (20 mM, 50 mM). In some experiments, U73122 (10  $\mu\text{M}$ , Sigma) was added to cultured cells for 10 min to determine whether responses were mediated by the  $\text{Plc}\beta 2$  pathway.

**Reverse Transcription PCR.** cDNAs from sorted cells, cultured organoids, or attached cells growing out from organoids were made using Clontech smart cDNA technology [SMARTer Pico PCR cDNA Synthesis Kit (cat. #634928) for sorted cells and cultured organoids and SMARTer PCR cDNA Synthesis Kit (cat. #634925) for 2D attached cells growing out from organoids]. *Lgr* and taste signaling element primers are intron-spanning primers with these sequences: 5'-taaagacgacggcaacagtg-3' (*Lgr5* forward), 5'-gattcggatcagccagctac-3' (*Lgr5* reverse), 5'-agataacagccccaagacc-3' (*Lgr4* forward), 5'-gcaggcagtgatgaacaaga-3' (*Lgr4* reverse), 5'-gatggggacagaggactcaa-3' (*Lgr6* forward), 5'-gcaaagactgtcagcagcac-3' (*Lgr6* reverse), 5'-cacgggaagaacaatcaggt-3' (*T1R1* forward), 5'-gcagcagcaatagcgtgta-3' (*T1R1* reverse), 5'-ggtcccata-tccatgtgt-3' (*T1R2* forward), 5'-agaatggccagcgtactgat-3' (*T1R2* reverse), 5'-aaatgtactggccaggcaac-3' (*T1R3* forward), 5'-caggaggagt-gacagcaca-3' (*T1R3* reverse), 5'-tgcctatgacatggtgcttg-3' (*gustducin* forward), 5'-ggtgcaccttagccacttc-3' (*gustducin* reverse), 5'-gcgctg-tagccatgtcata-3' (*NTPDase2* forward), 5'-aagagcagcaggagagcaac-3' (*NTPDase2* reverse), 5'-ggcattgctctcaatgacaa-3' (*GAPDH* forward), and 5'-tgtgaggagatgctcagtg-3' (*GAPDH* reverse). The sizes of the amplified fragments for *Lgr5*, *Lgr4*, *Lgr6*, *T1R1*, *T1R2*, *T1R3*, *gustducin*, *NTPDase2*, and *GAPDH* were 199, 261, 171, 283, 285, 269, 164, 217, and 200 bp, respectively. The amplified fragments were confirmed by direct sequencing. *GAPDH* was used as a positive control.

1. Sato T, Clevers H (2013) Primary mouse small intestinal epithelial cell cultures. *Methods Mol Biol* 945:319–328.

2. Marchenko S, Flanagan L (2007) Immunocytochemistry: Human neural stem cells. *J Vis Exp* (7):267.



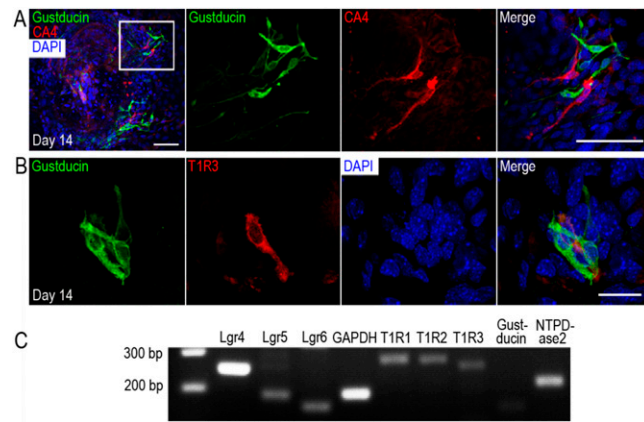

**Fig. S4.** Cells grown out from organoids derived from  $Lgr5^+$  cells on 2D surfaces express taste-cell markers. (A) Representative confocal images show the expression of gustducin (green) and CA4 (red) in cells that attached to the laminin-coated coverslip after growing out from organoids. (B) Representative image showing the presence of gustducin (green) and T1R3 (red) immunoreactive cells in cells that attached to the laminin-coated coverslip. Experiments were performed in triplicate. (C) RT-PCR results show the presence of transcripts for Lgr4, Lgr5, Lgr6, T1R1, T1R2, T1R3, gustducin, and NTPDase2 in attached cells that grew out from organoids. Experiments were performed in triplicate. (Scale bars: A, 50  $\mu$ m; B, 20  $\mu$ m.)

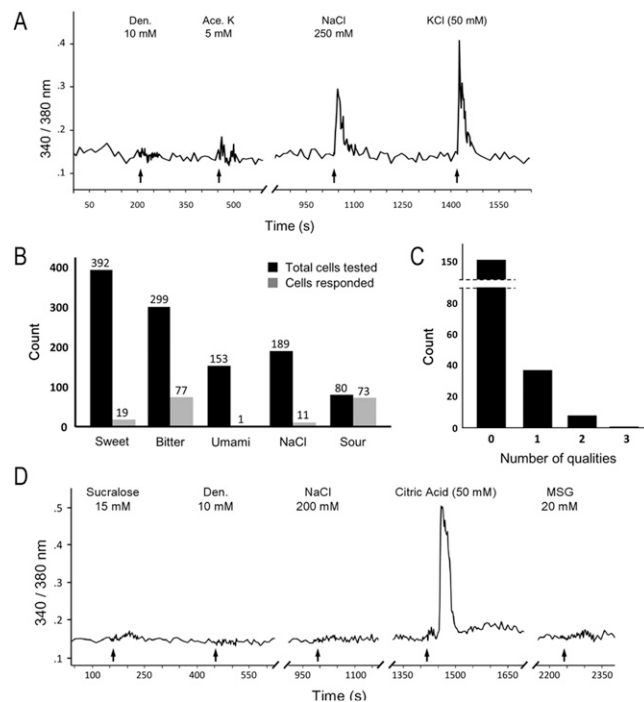

**Fig. S5.** Mature taste-like cells derived from single  $Lgr5^+$  cells are functional. (A) Representative trace of an organoid-derived salt-responsive taste cell responding to NaCl (250 mM) and KCl (50 mM). (B) Total number of cells tested with and number of cells that gave calcium responses to tastants representing different basic taste qualities [sweet, 5 mM or 20 mM acesulfame-K and 15 mM or 30 mM sucralose; bitter, 10 mM denatonium; umami, 20 or 50 mM monosodium glutamate (MSG); salty, 200 or 250 mM NaCl; sour, 50 mM citric acid at pH 4]. This graph includes data from 19 different imaging fields across 15 different organoid-derived 2D cultures. (C) Breadth of tuning in recorded cells. Data are from cells recorded at eight different imaging fields across seven different organoid-derived 2D cultures. Only imaging fields in which cells were tested for responses to at least three taste qualities (sweet, bitter, umami, and/or salty), not including sour, are included in this analysis. Sour responses are not included in the analysis because acid stimulation apparently evoked calcium mobilization through a nonspecific mechanism. (D) Representative trace of a cell that responded to 50 mM citric acid but not to any of the other stimuli tested.
